1 **Biomaterial armor in leaf-cutter ants**

2 Hongjie Li,<sup>1,2</sup> Chang-Yu Sun,<sup>3</sup> Yihang Fang,<sup>4</sup> Caitlin M. Carlson,<sup>1</sup> Huifang Xu,<sup>4</sup> Ana  
3 Ješovnik,<sup>5</sup> Jeffrey Sosa-Calvo,<sup>6</sup> Robert Zarnowski,<sup>7,8</sup> Hans A. Bechtel,<sup>9</sup> John H.  
4 Fournelle,<sup>4</sup> David R. Andes,<sup>7,8</sup> Ted R. Schultz,<sup>5</sup> Pupa U. P. A. Gilbert,<sup>3,4,10,#,\*</sup>  
5 Cameron R. Currie<sup>1,2\*</sup>

6 <sup>1</sup>Department of Bacteriology, University of Wisconsin-Madison, Madison, WI 53706,  
7 USA.

8 <sup>2</sup>Department of Energy Great Lakes Bioenergy Research Center, Wisconsin Energy  
9 Institute, University of Wisconsin-Madison, Madison, WI 53726, USA.

10 <sup>3</sup>Department of Physics, University of Wisconsin-Madison, Madison, WI 53706,  
11 USA.

12 <sup>4</sup>Department of Geoscience, University of Wisconsin-Madison, Madison, WI 53706,  
13 USA.

14 <sup>5</sup>Department of Entomology, National Museum of Natural History, Smithsonian  
15 Institution, Washington, DC 20013-7012, USA.

16 <sup>6</sup>School of Life Sciences, Arizona State University, Tempe, AZ 85287, USA.

17 <sup>7</sup>Department of Medicine, University of Wisconsin-Madison, Madison, WI 53706,  
18 USA.

19 <sup>8</sup>Department of Medical Microbiology and Immunology, University of Wisconsin-  
20 Madison, Madison, WI 53706, USA.

21 <sup>9</sup>Advanced Light Source Division, Lawrence Berkeley National Laboratory, Berkeley,  
22 CA 94720, USA.

23 <sup>10</sup>Departments of Chemistry, Materials Science and Engineering, University of  
24 Wisconsin-Madison, Madison, WI 53706, USA.

25 # previously publishing at Gelsomina De Stasio

26 \*To whom correspondence should be addressed. Email: [currie@bact.wisc.edu](mailto:currie@bact.wisc.edu)  
27 (C.R.C.); [pupa@physics.wisc.edu](mailto:pupa@physics.wisc.edu) (P.U.P.A.G.)

28 **Abstract**

29 Although calcareous anatomical structures have evolved in diverse animal groups,  
30 such structures have been unknown in insects. Here, we report the discovery of high-  
31 magnesium calcite [CaMg(CO<sub>3</sub>)<sub>2</sub>] armor overlaying the exoskeletons of major workers  
32 of the leaf-cutter ant *Acromyrmex echinator*. Live-rearing and *in vitro* synthesis  
33 experiments indicate that the biomineral layer accumulates rapidly as ant workers  
34 mature, that the layer is continuously distributed, covering nearly the entire  
35 integument, and that the ant epicuticle catalyzes biomineral nucleation and growth. *In*  
36 *situ* nanoindentation demonstrates that the biomineral layer significantly hardens the  
37 exoskeleton. Increased survival of ant workers with biomineralized exoskeletons  
38 during aggressive encounters with other ants and reduced infection by  
39 entomopathogenic fungi demonstrate the protective role of the biomineral layer. The  
40 discovery of biosynthesized high-magnesium calcite in the relatively well-studied  
41 leaf-cutting ants suggests that calcareous biominerals enriched in magnesium may be  
42 more common in metazoans than previously recognized.

43

44 Biomineral skeletons first appeared more than 550 million years ago<sup>1-5</sup>, and by the  
45 early Cambrian biomineral-based defensive structures had evolved in most extant  
46 metazoan phyla, apparently in response to increasing predation pressure<sup>6</sup>. The  
47 minerals involved, as well as the biogenic structures they form, are diverse. Calcium-  
48 carbonate biomineralization is particularly widespread among metazoans<sup>7</sup>: the hard  
49 parts of corals<sup>8</sup>, mollusk shells<sup>9</sup>, stomatopod dactyl club<sup>10</sup>, and sea urchin spines<sup>11</sup>  
50 contain calcium carbonate, as do the light-focusing eye lenses of chitons and  
51 brittlestars<sup>12,13</sup>. Magnesium-enriched calcite has been discovered in the central part of  
52 the sea urchin tooth, where the increased hardness imparted by magnesium is thought  
53 to aid in the grinding of limestone<sup>14-16</sup>. Given the importance of calcareous anatomical  
54 structures across metazoan phyla and given that magnesium significantly strengthens  
55 such structures, it is surprising that high-magnesium calcite appears to be rare in  
56 animals. It is also surprising that, despite the near ubiquity of biogenic mineralization  
57 across metazoan phyla and the widespread presence of calcium carbonate in the  
58 Crustacea, biomineralized calcium carbonate has so far remained unknown in the  
59 most diverse group of animals, the insects, which arose from within the Crustacea<sup>17</sup>.  
60 Here we report the discovery of a dense layer of biogenic high-magnesium calcite in  
61 the leaf-cutter ants *Acromyrmex echinator*.

62 Fungus-growing "attine" ants (tribe Attini, subtribe Attina) engage in an ancient and  
63 obligate mutualism with coevolved fungi (order Agaricales), which they cultivate for  
64 food. Fungus farming, which has been described as a major transition in evolution<sup>18</sup>,  
65 evolved only once in ants around 60 million years ago<sup>18</sup>. Leaf-cutting ants (genera  
66 *Acromyrmex* and *Atta*), a phylogenetically derived lineage that arose within the  
67 fungus-growing ants around 20 million years ago, harvest fresh vegetation as the  
68 substrate on which they grow their fungal mutualists. They are ecologically dominant  
69 herbivores in the New World tropics<sup>18,19</sup> and serve important roles in carbon and  
70 nitrogen cycling<sup>20</sup>. A mature leaf-cutter ant colony comprises a "superorganism" with  
71 ~100,000 to > 5 million workers, a single queen, and a complex society with a highly

72 refined division of labor based both on worker size and age. In addition to the leaf-  
73 cutters, 15 other genera of ants occur within the Attina, all of which grow fungus  
74 gardens, form colonies of hundreds to a few thousand workers, and use dead  
75 vegetative matter or caterpillar frass rather than fresh leaves and grasses as substrates  
76 for their gardens. In addition to the symbiotic association with their fungal cultivars,  
77 many fungus-growing ants engage in a second mutualism with Actinobacteria (genus  
78 *Pseudonocardia*), which produce antibiotics that help defend the garden from fungal  
79 pathogens<sup>21-23</sup>. Fungus-growing ant colonies, containing both fungal crops and  
80 immature ant brood, represent a rich nutritional resource for a wide variety of  
81 marauding ant species, including army ants and other known "agro-predatory" raiders  
82 of ant agriculture. Smaller fungus-growing ant colonies are also subject to attack by  
83 the large-sized soldier castes of *Atta* leaf-cutter ants, which use their powerful  
84 mandibles to defend their colonies' territories against other, encroaching ant  
85 species<sup>24,25</sup>.

86 Many species of fungus-growing ants are variably covered with a whitish granular  
87 coating, uniformly distributed on their otherwise dark brown cuticles<sup>26</sup> (Fig. 1a). We  
88 report here for the first time that this coating is in fact an outer layer of crystalline  
89 mineral covering the ant exoskeleton (Fig. 1b inset) by combining data from *in situ* X-  
90 ray diffraction (XRD), electron microscopy, electron backscatter diffraction (EBSD),  
91 quantitative electron probe micro-analysis (EPMA), raman and attenuated total  
92 reflectance Fourier-transform infrared (ATR-FTIR) spectroscopy. In addition, we  
93 conduct synchrotron X-ray PhotoEmission Electron spectro-Microscopy (X-PEEM),  
94 *in vitro* synthesis, *in vivo* observation of crystallization and growth through ant-  
95 rearing experiment, *in-situ* nanoindentation, ant battle, and infection by  
96 entomopathogenic fungi to examine the mechanism of crystal growth and its  
97 functional role.

## 98 **Results and discussion**

### 99 **Morphological, structural, and chemical characteristics of epicuticular minerals.**

100 Microscopic imaging of polished cuticular cross-sections of the leaf-cutting ant  
101 *Acromyrmex echinator* reveals a clear interface between this crystalline layer and the  
102 ant cuticle (Fig. 1c). This layer is brighter than the cuticle in backscattered electron  
103 (BSE) mode scanning electron microscopy (SEM) (Supplementary Fig. 1 and 2),  
104 indicating that it consists of heavier elements and that it is continuously distributed,  
105 covering nearly the entire integumental surface. Energy-dispersive X-ray  
106 spectroscopy (EDS) characterization of the cuticular coating further indicates that the  
107 crystalline layer contains significant amounts of magnesium and calcium  
108 (Supplementary Fig. 3 a-f), suggestive of a Mg-bearing calcite biomineral. X-ray  
109 diffraction (XRD) analysis confirms the high-magnesium calcite composition of the  
110 biomineral layer in *Ac. echinator*, as indicated by the *d*-spacing of (104) peak at  
111 2.939 Å (Fig. 1b and Supplementary Table 1). Quantitative electron probe micro-  
112 analysis (EPMA) reveals a magnesium concentration of 32.9±2.7 mol %  
113 (Supplementary Table 2). Using bright-field transmission electron microscopy  
114 (TEM), selected area electron diffraction (SAED), TEM-EDS, Raman and Attenuated  
115 Total Reflectance Fourier Transform Infrared (ATR-FTIR) spectra, we further  
116 confirm the biomineral is a high-magnesium calcite with chemically heterogeneous  
117 crystals and with no observable Ca-Mg ordering (Supplementary Fig. 4 and 5).  
118 Extensive XRD analyses of *Ac. echinator*, including both lab-reared and field-  
119 collected workers from Panama and Brazil, confirms the consistent presence of high-  
120 magnesium calcite in quantities of 23–35 mol% MgCO<sub>3</sub> (Supplementary Table 2 and  
121 3).

122 The mineral-cuticle interface of *Acromyrmex echinator* was investigated using  
123 synchrotron X-ray PhotoEmission Electron spectro-Microscopy (X-PEEM) at the  
124 Advanced Light Source (Lawrence Berkeley National Laboratory, Berkeley, CA)  
125 (Fig. 1c)<sup>8</sup>. Distinct X-ray Absorption Near Edge Structure (XANES) spectra occur at

126 the carbon K-edge for each of three regions: cuticle, epicuticle, and mineral layer  
127 (Fig. 1d; mapped as spectral components in Fig 1e). The C spectra for the mineral  
128 layer show a strong carbonate peak at 290.3 eV (Fig. 1d). The oxygen K-edge spectra  
129 extracted from the ant mineral layer indicate that the carbonate crystals are crystalline  
130 with a strong crystal orientation dependence of peak 1 at 534 eV (Fig. 1f).  
131 Polarization-dependent imaging contrast (PIC) mapping<sup>27,28</sup> across the mineral layer,  
132 in which color quantitatively displays the orientation of the crystal *c*-axes, indicates  
133 that crystals are randomly oriented (Fig. 1, g and h). The width of peak 2 in all O  
134 spectra (Fig. 1f) indicates a mixture of phases with high- and low-Mg  
135 concentrations<sup>29</sup>. This chemical heterogeneity is consistent with the XRD data (Fig.  
136 1b), with electron microprobe analyses (Supplementary Table 2) backscatter  
137 diffraction (EBSD) results (Supplementary Fig. 6), and with the magnified PIC map  
138 regions (Fig. 1g).

139 Unlike the typical chitin spectrum of insect epicuticle, the *Acromyrmex echinator*  
140 XANES epicuticular spectrum is consistent with a protein-enriched insect  
141 epicuticle<sup>30</sup>. Protein hydrolysis of the cuticular layers verifies that the epicuticle is  
142 proteinaceous (Supplementary Fig. 7). Further, the epicuticular spectrum shows a  
143 very intense peak at 285.2 eV (Fig. 1d), which, based on its energy position and its  
144 symmetric line shape, suggests that the epicuticle contains one or more phenylalanine  
145 (Phe) enriched proteins<sup>31</sup>. High Performance Liquid Chromatography (HPLC) amino  
146 acid profiling of the protein layer of the *Ac. echinator* epicuticle confirms the  
147 presence of phenylalanine in the ant cuticle (Supplementary Table 4).

148 ***In vitro* high-mg calcite synthesis.** To assess whether epicuticular proteins mediate  
149 the precipitation of high-magnesium calcite in *Acromyrmex echinator*, we performed  
150 synthetic biomineralization experiments in which the cuticle of *Ac. echinator* was  
151 incubated in saturated carbonate solutions with a [Mg<sup>2+</sup>]/[Ca<sup>2+</sup>] ratio of 5 at ambient  
152 conditions<sup>32</sup> (Fig. 2a and Supplementary Fig. 8). In these *in vitro* experiments,  
153 nanocrystal aggregates precipitated on the epicuticle of *Ac. echinator* (Fig. 2, b and

154 c), and were identified as anhydrous high-magnesium calcite by XRD and EDS  
155 analyses (Fig. 2d and Supplementary Fig. 9). As a negative control, we performed the  
156 same *in vitro* mineralization experiments using the cuticle of the leaf-cutter ant *Atta*  
157 *cephalotes*, which belongs to the sister genus of *Acromyrmex*, does not have a  
158 biomineral cuticular layer, and has different cuticular structures (Supplementary Fig.  
159 10). We found that only aragonite crystals formed, mainly on the hairs of *At.*  
160 *cephalotes* and almost never on the epicuticle (Supplementary Figs 11 and 12),  
161 indicating direct precipitation from solution since aragonite is the favorable  
162 crystalline precipitate in high Mg conditions<sup>33</sup>. In control experiments using *Ac.*  
163 *echinator* epicuticles either treated with KOH to hydrolyze surface proteins or coated  
164 with a 10 nm platinum layer to disable protein function, only aragonite crystals  
165 formed (Fig. 2d, Supplementary Fig. 9). Interestingly, in synthetic biomineralization  
166 experiments using cuticle from different developmental stages (pupae to fully mature  
167 adult workers), we found that only mature worker epicuticles catalyze the  
168 precipitation of high-magnesium calcite (Fig. 2e), consistent with the presence of a  
169 more substantial protein layer in mature workers indicated by SEM examination  
170 (Supplementary Figs. 13 and 14). These *in vitro* synthesis results suggest that the  
171 protein layer in the epicuticle of *Ac. echinator* and the unusual morphological  
172 structures on the cuticles of the ants catalyze the low-temperature nucleation and  
173 growth of magnesium-rich calcite on the epicuticles of mature workers of *Ac.*  
174 *echinator*.

175 ***In vivo* crystallization and growth of high-mg calcite.** To explore the  
176 developmental timing of biomineral formation on the epicuticles of *Acromyrmex*  
177 *echinator* workers, we conducted rearing experiments. Twenty pupae at the same  
178 developmental stage were collected, randomly sorted into two groups of ten, and  
179 reared to callow adults, then one worker from each of the two groups was collected  
180 every second day and analyzed by XRD and eSEM (Fig. 2, f and g). No biomineral  
181 layer was visible nor detected with XRD on workers 0 to 6 days after eclosion from

182 the pupal to adult stage. In contrast, 8 days after eclosion visible and XRD-detectable  
183 high-magnesium calcite was present on workers. Magnesium was rapidly integrated  
184 into the calcareous biomineral in these older workers, with XRD measurements of  
185 mol% MgCO<sub>3</sub> reaching ~35% within 2 days after the initiation of biomineralization  
186 on individual worker ants (i.e., from days 6 to 8 after eclosion; Fig. 2g).

187 Three independent lines of evidence indicate that epicuticular biomineral crystals are  
188 ant-generated rather than adventitiously precipitated from the environment or  
189 generated by bacteria. First, in both C component maps (e.g. Fig. 1e) and PIC maps  
190 (e.g. Fig. 1g) the magnesium-rich calcite crystals outside the epicuticle are space-  
191 filling, a characteristic of biominerals formed by eukaryotes<sup>34</sup>. Second, magnesium-  
192 rich calcite biominerals are spatially co-localized with epicuticular protein(s), which  
193 are likely involved in biomineral formation, consistent with the absence of biomineral  
194 formation in *in vitro* synthesis experiments in which ant epicuticles were either coated  
195 with platinum or excluded. Third, the ant rearing experiments were carried out in  
196 sterile, clean Petri dishes, eliminating the possibility of biominerals acquired from  
197 external sources.

198 **Mechanical protection of epicuticular high-mg calcite.** It is plausible that  
199 epicuticular high-magnesium calcite enhances the structural robustness of the ant  
200 exoskeleton, providing better defense for ants engaged in ‘wars’ with other ants or  
201 under attack from predators or parasites. To test this hypothesis, we first quantified  
202 the increase in hardness conferred by the protective biomineral layer using *in-situ*  
203 nanoindentation in an SEM (Fig. 3a, Supplementary Fig. 15 and Supplementary  
204 Video 1). Since the surface of the exoskeleton is not flat, conventional  
205 nanoindentation could not be used, whereas *in-situ* nanoindentation with real-time  
206 microscopic imaging allowed near-perpendicular contact of the probe tip with the  
207 surface (Supplementary Fig. 15). Typical non-biomineralized ant cuticle, made  
208 primarily of chitin, has a hardness of  $H \sim 0.73 \pm 0.04$  GPa (Fig. 3a and Supplementary  
209 Fig. 16). In contrast, when high-magnesium calcite and cuticular layers are combined,



210 the composite structure has a greater than two-fold increase in hardness ( $1.55\pm 0.48$   
211 GPa, compared to cuticle alone of  $0.73\pm 0.04$  GPa) (Fig. 3a and Supplementary Fig.  
212 16 and 17). Given that the biomineral layer has an average thickness of  $2.3\ \mu\text{m}$  and  
213 that it overlays a cuticle with an average thickness of  $33.5\ \mu\text{m}$ , this more than two-  
214 fold increase in hardness is conferred by only a 7% increase in cuticle thickness  
215 (Supplementary Fig. 18). Additional *in-situ* nano-mechanical testing of the cuticles of  
216 *Atta cephalotes* ants, which do not have a biomineral layer, as well as of other  
217 common insects, including a beetle (*Xylotrechus colonus*) and a honey bee (*Apis*  
218 *mellifera*), produced similar hardness values in the range of 0.4–0.7 GPa (Fig. 3a and  
219 Supplementary Fig. 16) as they are all mainly made of chitin. The nano-mechanical  
220 measurements indicate that the biomineralized layer substantially hardens the  
221 exoskeleton of *Ac. echinator*, consistent with the hypothesis that the biomineral layer  
222 functions as protective armor.

223 To further test the role of the biomineral as protective armor, we exposed  
224 *Acromyrmex echinator* major workers with and without biomineral armor to *Atta*  
225 *cephalotes* soldiers in ant aggression experiments designed to mimic territorial ‘ant  
226 wars’ that are a relatively common occurrence in nature<sup>24,35,36</sup>. In direct combat with  
227 the substantially larger and stronger *At. cephalotes* soldier workers (average body  
228 length of 10.4 mm and a head capsule width of 6.1 mm, compared to major *Ac.*  
229 *echinator* body length of 6.4 mm and head capsule width of 2.9 mm) (Fig. 3b), ants  
230 with biomineralized cuticles lost significantly fewer body parts (Fig. 3c and  
231 Supplementary Fig. 19) and had significantly higher survival rates compared to  
232 biomineral-free ants (Fig. 3d, Supplementary Video 2 and 3). Further, in direct  
233 aggression experiments in which biomineral-armored *Ac. echinator* workers were  
234 pitted against *At. cephalotes* soldiers, all of the *At. cephalotes* soldiers died, whereas  
235 only a few such deaths occurred when *Atta* soldiers were pitted against biomineral-  
236 free ants. SEM examination of biomineral-armored *Ac. echinator* ants after combat  
237 with *Atta cephalotes* soldiers showed significantly less damage to their exoskeletons

238 (Supplementary Fig. 20). Notably, biomineral armor is present in mature major  
239 workers, which forage outside of the nest, further indicating that epicuticular high-  
240 magnesium calcite is critical in a highly competitive environment (Supplementary  
241 Figs 21 and 22). These results, taken together, are consistent with a role for  
242 epicuticular high-magnesium calcite as armor that defends workers from aggressive  
243 interactions with other ants.

244 Biomineral armor could also help protect ants from pathogens. In a series of  
245 experiments, we focused on entomopathogenic fungi, which establish infection by  
246 penetrating the insect exoskeleton and have significant impacts on survival. We  
247 exposed propleural plate of *Ac. echinator* major worker ants with and without  
248 biomineralized exoskeletons to the spores of the entomopathogenic fungus  
249 *Metarhizium anisopliae* (Ascomycota, Hypocreales). Compared to biomineral-free  
250 workers, major workers with biomineralized exoskeletons were significantly more  
251 resistant to infection. Specifically, we found that a majority of ants without  
252 biominerals died from infection within 4 days ( $1.0 \pm 0.4$  and  $0 \pm 0$  ants survived to 4  
253 and 6 days, respectively), whereas an average of  $2.2 \pm 0.4$  and  $1.4 \pm 0.5$  (out of 3  
254 individuals per sub-colony over 5 sub-colonies) ants with biominerals survived to 4  
255 and 6 days, respectively (Fig. 3e). All ants succumbed to infection within 6 days.  
256 Examination of workers without biominerals exposed to *M. anisopliae* revealed  
257 substantial fungal growth and emergence (Fig. 3e inset).

258 The biota of the Ediacaran period (635 to 541 million years ago) included organisms  
259 of known and unknown phylogenetic affinities that lived in oceans with a high ratio  
260 of magnesium to calcium. Most were soft-bodied, but some possessed rudimentary  
261 skeletons composed either of aragonite (a form of calcium carbonate) or, notably, of  
262 high-magnesium calcite<sup>6</sup>. Around 550 million years ago, coinciding with a shift in the  
263 Earth's oceans to significantly lower magnesium-to-calcium ratios, metazoans with  
264 strongly calcified internal and external skeletons appeared, including most familiar  
265 modern phyla. In spite of its strengthening properties, the enrichment of calcareous

266 structures with high concentrations of magnesium in Cambrian and modern  
267 metazoans has until now remained only known from a very small plate within the  
268 tooth of sea urchins. The ability of fungus-growing ants to facilitate the formation of  
269 magnesium-rich biominerals on their epicuticles is thus surprising. Further, given that  
270 fungus-growing ants are among the most extensively studied tropical insects, our  
271 finding raises the intriguing possibility that high-magnesium calcite, and perhaps even  
272 partially ordered dolomite, biomineralization may be more widespread than  
273 previously suspected.

274 Fungus farming in ants originated ~60 million years ago in South America when a  
275 hunter-gatherer ancestor irreversibly committed to subsistence-scale cultivation of  
276 fungal crops for food<sup>37</sup>. The transition to industrial-scale agriculture occurred ~20  
277 million years ago with the origin of the ecologically dominant leaf-cutting ants, in  
278 which colony populations are orders of magnitude greater in size and in which  
279 physically distinct worker castes enable complex division of labor, paralleling the  
280 similar importance of agriculture in driving the expansion of human populations and  
281 the elaboration of human social systems<sup>38</sup>. Further paralleling human agriculture, the  
282 fungal cultivars of the ants are highly susceptible to pathogens and the ants have  
283 responded, in part, by evolving associations with antibiotic-producing bacteria to  
284 protect their crops<sup>22</sup>. Early sedentary human agricultural settlements represented rich  
285 resources that were highly susceptible to marauding bands of human raiders, leading  
286 to the development of multiple modes of defense, including specialized warrior  
287 castes, fortified cities, weapons, and protective armor<sup>38</sup>. Here we show that, in another  
288 striking parallel with agriculture-driven human cultural evolution, fungus-growing  
289 ants have evolved biomineralized armor that serves, at least in part, to protect them  
290 from other ants, including other fungus-growing ants in disputes over territory and  
291 "agropredatory" ants that are known to raid their colonies and to consume their  
292 gardens and brood.

## 293 **Methods**

294 **Photoemission electron microscopy (PEEM).** *Acromyrmex echinator* ants were  
295 freeze-dried prior to PEEM sample preparation. The heads of the ants were then  
296 detached and embedded in Epofix epoxy (EMS, Hatfield, PA), ground with SiC  
297 sandpapers, polished with Al<sub>2</sub>O<sub>3</sub> suspensions of 300 nm (MicroPolish II, Buehler,  
298 Lake Bluff, IL) and 50 nm (Masterprep, Buehler, Lake Bluff, IL) particle sizes<sup>8,40</sup>. 22  
299 g/L Na<sub>2</sub>CO<sub>3</sub> saturated solution was added regularly onto the pad during grinding and  
300 polishing to prevent carbonate dissolution, and the Al<sub>2</sub>O<sub>3</sub> suspensions were also  
301 dialyzed against 22 g/L Na<sub>2</sub>CO<sub>3</sub> saturated solution<sup>41</sup>. The samples were re-embedded  
302 to fill as much as possible the interior of the ants and the gap between mineral and  
303 epoxy, and then the polishing procedures were repeated. After final polishing, the  
304 samples were rinsed with ethanol and gently wiped with TexWipe Cotton (Texwipe,  
305 Kernersville, NC), air dried, and coated with 1 nm Pt on the areas to be analyzed and  
306 40 nm Pt around it<sup>42</sup>.

307 For C K-edge spectra, PEEM stacks were acquired by scanning across 280-320 eV  
308 range with 0.1-eV step between 284 and 292 eV, and 0.5-eV step elsewhere, resulting  
309 in 145 images per stack<sup>43</sup>. For O K-edge spectra, PEEM stacks were acquired by  
310 scanning across 525-555 eV range with 0.1-eV step between 530 and 545 eV, and  
311 0.5-eV step elsewhere, resulting in 181 images per stack<sup>44,45</sup>. The images were  
312 stacked and processed with GG Macros in Igor Pro 6.37<sup>46</sup>.

313 For PIC mapping, a stack of 19 images were acquired by fixing the photon energy at  
314 the O K-edge  $\pi^*$  peak (534 eV) and changing the X-ray polarization from horizontal  
315 to vertical with a 5° step<sup>40,47,48</sup>. Colored PIC maps were then produced using Igor Pro  
316 6.37 with GG Macros<sup>46</sup>.

317 **Masking the component map.** The component map in Fig. 1e was masked using an  
318 image of the same region acquired in SEM in backscattered electron (BSE) mode.  
319 Unfortunately, in both the PEEM average image in Fig. 1c and in the BSE image, the  
320 gray levels in the embedding epoxy and those in the cuticle are similar. Therefore,  
321 there is no rigorous and quantitative method to select one but not the other. We used  
322 Adobe Photoshop and the Magic Wand tool with a tolerance of 30 to select all of the  
323 cuticle and deleted all those pixels from a black mask. The brighter mineral and all of  
324 the mineral debris deposited on the epoxy were then selected using the Magic Wand  
325 and a tolerance of 50 on the BSE image. These were also deleted from the same black  
326 mask. The black pixels in the BSE image correspond to gaps between the cuticle and  
327 the epoxy, or holes between mineral crystals, those black pixels were remained black  
328 in the black mask. The bright mineral debris is presumably an artifact of polishing, as  
329 they appear both in PEEM and SEM images and are spectroscopically identified  
330 without a doubt as mineral. These were also removed from the mask and therefore  
331 displayed in Fig. 1e, as removing them would have been an artifact. The BSE image  
332 was warped to correspond correctly to the PEEM image using Adobe Photoshop and  
333 specifically the Puppet Warp tool.

334 **Obtaining component spectra.** We extracted single-pixel spectra from the cuticle,  
335 the epicuticle, and the mineral regions. These were identified as the only 3 reliable  
336 components that were spectroscopically distinct from one another and not linear  
337 combinations of other components. The single-pixel spectra from the same material  
338 were extracted from each stack, aligned in energy, and averaged. The averaged  
339 spectrum was then normalized to the beamline  $I_0$  curve, acquired with precisely the  
340 same energy steps.

341 The 3 spectra were then aligned between 280.0 and 283.7 eV. The cuticle and  
342 epicuticle spectra were shifted in energy so that the first peak was at 285.2 eV for  
343 chitin and proteins, following Cody et al. 2011<sup>30</sup>, whereas the mineral spectra was  
344 shifted in energy so that the last peak, characteristic of carbonates, was at 290.3 eV,  
345 following Madix and Stöhr<sup>49,50</sup>. The cuticle spectrum is identical to that published by  
346 Cody et al. 2011 obtained from scorpion cuticle, and interpreted as chitin. The  
347 spectrum has a peak at 285.2 corresponding to C=C in aromatic carbon, a shoulder at  
348 ~287 eV, and a peak at 288.2 eV corresponding to C=O in chitin. The epicuticle  
349 spectrum shows the characteristics C=C of aromatic amino acids (tyrosine,  
350 tryptophan, and phenylalanine)<sup>31</sup>, a shoulder at 287.6 eV corresponding to C-H  
351 aliphatic carbon, and a sharp peak at 288.2 eV corresponding to carboxyl group  
352 (C=O) in the peptide bonds of all proteins. Compared to the spectra in tyrosine and  
353 tryptophan, the phenylalanine spectrum has a more symmetric peak at 285.2 eV,  
354 allowing us to assign this peak to phenylalanine in the epicuticle<sup>31</sup>. The C=O occurs at  
355 the expected 288.2 eV (Myers et al. 2018)<sup>43</sup>. These normalized and averaged spectra  
356 were then adopted as “component spectra”, displayed in Fig. 1d, and used to obtain a  
357 component map in Fig. 1e.

358 **Component mapping.** The extracted, averaged, normalized, and aligned component  
359 spectra were made references by multiplying the  $I_0$ . Spectrum in each pixel of the  
360 stack was analyzed and best-fitted to a linear combination of the component  
361 references: cuticle, epicuticle, and mineral. The resulting component proportion maps  
362 were exported as a gray level image and combined by the Merge Channel function in  
363 Adobe Photoshop, which became a fully quantitative RGB image (Supplementary  
364 Fig. 22). Individual component distribution maps were presented in Supplementary  
365 Fig. 23. For Fig. 1e, we enhanced the blue channel by adjusting the midtone value in  
366 Levels 5 times greater than the other two channels, to emphasize the presence of  
367 mineral in the cuticle and epicuticle.

368 **In vitro synthesis.** All synthesis experiments were carried out in sealed plastic bottles  
369 at 19°C for 7 d. Solutions were prepared by dissolving 50 mM  $MgCl_2 \cdot 6H_2O$ , 10 mM  
370  $CaCl_2 \cdot 2H_2O$ , and 50 mM  $NaHCO_3$  with pH buffer to ~8.0 with NaOH to simulate  
371 modern seawater chemistry. Solution were mixed for 20 minutes and then divided  
372 into 100 mL bottles with ant exoskeleton (Supplementary Fig. 5). Peptide synthesis  
373 experiments with 1 mM, 5 mM, and 10 mM of phenylalanine peptide (H-Phe-Phe-  
374 Phe-OH) (Bachem, CA) were mixed into solutions without ants. All vessels during

375 the experiments have been washed with deionized water and pretreated with 6M  
376 hydrochloric acid to prevent carbonate contamination. Filtered solution and ants were  
377 airdry for XRD and SEM characterization.

378 **Scanning electron microscopy (SEM) and electron backscatter diffraction**  
379 **(EBSD).** Scanning electron microscopy (SEM) were done using a Hitachi S3400 at 15  
380 kV. Images were obtained in both variable pressure and vacuum mode. Energy-  
381 dispersive x-ray spectroscopy (EDS) and electron backscatter diffraction (EBSD)  
382 were carried out using an AZtecOne system with silicon-drift detector from Oxford  
383 instruments. Samples were coated with 5 nm Pt coating. Phases used in EBSD are  
384 constructed based on Mg-poor ( $a = 4.990\text{\AA}$ ,  $c = 17.062\text{\AA}$ ; Graf, 1961), Mg-medium ( $a$   
385  $= 4.920\text{\AA}$ ,  $c = 16.656\text{\AA}$ ; calculated), Mg-rich ( $a = 4.850\text{\AA}$ ,  $c = 16.250\text{\AA}$ ) regions.  
386 However, given the EBSD is not particularly sensitive to unit-cell parameter  
387 differences, chemical heterogeneity from EBSD is only qualitative.

388 **Transmission electron microscopy (TEM).** TEM measurements were carried out  
389 using a Philips CM200UT TEM instrument operating at 200 kV acceleration voltage  
390 with 0.5 mm spherical aberration (Cs) and a point resolution of 0.19 nm. Images and  
391 electron diffraction were collected with a CCD camera and analyzed with Gatan  
392 DigitalMicrograph software. Samples that have been previously examined by XRD  
393 and SEM were rinsed with ethanol and DI water to remove glue residue. Samples  
394 were then crushed in an agar mortar, suspend in acetone, and drop onto Lacey/ carbon  
395 200 mesh copper grid. Composition of phases were confirmed with energy-dispersive  
396 X-ray spectroscopy (EDS) and analyzed with Thermo Noran software.

397 ***In situ* X-ray diffraction (XRD) analyzes.** *In situ* X-ray diffraction (XRD) were  
398 performed using a Rigaku Rapid II X-ray diffraction system with Mo  $K\alpha$  radiation.  
399 This XRD instrument use a 2-D image-plate detector for signal collection and  
400 integrated using Rigaku's 2DP software. XRD were run at 50 kV and a 100- $\mu\text{m}$   
401 diameter collimator. Whole fresh ant samples were glued onto American Durafilm  
402 Kapton® tube with vacuum grease. Ant samples were then spin around phi and  
403 oscillate on omega. Synthesized powder samples were sealed in Kapton tube and run  
404 with fixed omega and phi spin. Refinements for phase percentage and unit-cell  
405 parameter were run using Jade 9.0 software with American Mineralogist Crystal  
406 Structure Database (AMCSD) and the PDF-4+ database from the International Centre  
407 for Diffraction Data (ICDD). Disordered dolomite reference was constructed based on  
408 unit cell parameter of a disordered dolomite with 50 mol.%  $\text{MgCO}_3$  and powder  
409 diffraction pattern calculated by CrystalMaker built-in CrystalDiffract software.

410 **Sectioning and transmission electron microscopy (TEM).** Ants for sectioning and  
411 transmission electron microscopy were fixed in cold 2% glutaraldehyde in Na-  
412 cacodylate buffer. Postfixation was done in 2% osmium tetroxide and specimens were  
413 subsequently dehydrated in a graded acetone series. Specimens were embedded in  
414 Araldite and sectioned with a Reichert Ultracut E microtome. Semithin 1- $\mu\text{m}$  sections

415 for light microscopy were stained with methylene blue and thionin. Double-stained  
416 70-nm thin sections were examined in a Zeiss EM900 electron microscope.

417 **Quantitative electron probe micro-analysis (EPMA).** The carbonate EPMA data  
418 were acquired with a CAMECA SXFive FE electron probe in the Cameca Electron  
419 Probe Lab in the Department of Geoscience at the University of Wisconsin-Madison.  
420 Operating conditions were 7 kv and 10 nA (Faraday cup), using a focused beam. A  
421 low accelerating voltage was used to shrink the analytical volume to less than 300 nm.  
422 Peak counting time was 10 seconds, with background acquired for 10 seconds. Mg Ka  
423 was acquired with a TAP crystal and Ca Ka with an LPET crystal. The standard used  
424 as Delight Dolomite. Automation and data reduction utilized Probe for EPMA (Probe  
425 Software), Carbon and oxygen were accounted for in a robust procedure in the Probe  
426 for EPMA software: oxygen was calculated based upon stoichiometry to the measured  
427 Mg and Ca, with carbon calculated relative to that oxygen value (1:3), with this being  
428 iterated several times within the Armstrong/Love Scott matrix correction. The  
429 resulting values were then evaluated for actual accuracy, based upon two criteria: a  
430 non-normalized analytical total close to 100 wt% (~98-102 wt%), and for a formula  
431 basis of 3 oxygens, the carbon formula value being close to 1.00 (~.99-1.01). With  
432 these conditions met, the determined compositions were deemed acceptable.

433 **Raman and attenuated total reflectance Fourier-transform infrared (ATR-  
434 FTIR) spectroscopy.** Ant mineral samples for Raman experiments were prepared by  
435 bleaching the freeze-dried ant samples in 8.25% NaClO commercial bleach for 24h at  
436 room temperature to remove the exposed organic materials (7). Raman spectra were  
437 collected using a LabRam Raman microprobe (JY Horiba, Inc.) equipped with a  
438 Microscope (Olympus DX41, 50X and 100X objectives) and a 633 nm laser. Spectra  
439 were acquired with a CCD camera behind a spectrometer (the accumulations and  
440 integration time varied). The ant carbonate powders were dropped on a microscope  
441 slide just before individual measurement.

442 For ATR-FTIR, freeze-dried ant samples were used directly. ATR-FTIR data  
443 collection was conducted on a Perkin-Elmer 1720x spectrometer according to  
444 manufacturer's instructions.

445 **Rearing experiments.** In total of twenty worker pupae of *Ac. echinator* at the same  
446 developmental stage and its ~10g fungus-garden were collected and randomly sorted  
447 into two groups of ten and maintain them in chambers (diameter 6 cm, height 4 cm)  
448 with wet cotton. Reared to callow workers (around 3 hours) and followed by one  
449 worker from each of two groups was collected every second day. The fresh ant  
450 samples were subjected to XRD analyses immediately and followed by  
451 Environmental scanning electron microscope examination (eSEM). For eSEM, an FEI  
452 QUANTA 200 eSEM (FEI Company) was used. Ants were placed directly onto the  
453 eSEM stub and examined without any preparation (i.e., samples were not fixed or

454 coated for this analysis). All samples were analyzed at 5.0 torr, 3.0 spot size, and  
455 4 °C.

456 **Ant sample preparation for SEM analyses of cuticular structure.** Worker ant  
457 cuticles from *Ac. echinator* at different developmental stages (pupae to fully mature  
458 adult workers) and *At. cephalotes* were immediately fixed with 4% (vol/vol)  
459 formaldehyde and 1% glutaraldehyde at 22°C RT overnight. Samples were then  
460 washed with PBS and treated with 1% osmium tetroxide for 30 min at 22°C. Samples  
461 were subsequently washed with a series of increasing ethanol dilutions (30 to 100%  
462 [vol/vol]), followed by critical point drying and coating with 1-nm platinum.  
463 Scanning electron microscopy (SEM) of samples was performed using a LEO 1530  
464 microscope to investigate the cuticular structure.

465 **High Performance Liquid Chromatography (HPLC) analysis.** Dissected ant cuticle  
466 samples were placed in 100 µl 25% TFA containing 10 mM DTT and were hydrolyzed  
467 at 110°C for 24 h. Hydrolyzed samples were then dried at 45°C under stream of nitrogen  
468 and resuspended in 50 mM HCl. Amino acids were then converted into respective  
469 fluorescent derivatives using *o*-phthalaldehyde (OPA) (Agilent #5061-3335). Briefly,  
470 5 µl sample aliquot was added to 20 µl of 40 mM potassium tetraborate buffer (pH 9.8)  
471 followed by addition of 5 µl OPA, mixed gently and another 40 µl water was added.  
472 The mixture was filtered through a 0.45 µm cellulose acetate 4-mm syringe filter  
473 (Nalgene #171-0045). Freshly prepared samples were immediately subjected to HPLC  
474 analysis.

475 Amino acids were analyzed using a modified method described elsewhere<sup>51</sup>. The  
476 apparatus used was a custom-built dual analytical/semi-preparative Shimadzu system  
477 consisting of a SIL-20AC autosampler, a CBM-20A system controller, two LC-20AR  
478 pumps, a C50-20AC oven, a PDA S10-M20A detector, and a CPP-10Avp detector.  
479 Chromatographic separation of OPA-derivatized amino acids was performed using an  
480 Agilent ZORBAX Eclipse AAA column (4.6mm x 150 mm x 3.5 µm; Agilent #963400-  
481 902) coupled with a ZORBAX Eclipse AAA Analytical Guard Column (4.6 mm x 12.5  
482 mm x 5 µm; Agilent #820950-931) heated at 40°C. The gradient elution was applied  
483 using 40 mM sodium phosphate dibasic buffer (pH 7.8) as solvent A and a mixture of  
484 acetonitrile, methanol, and water (45:45:10, v/v/v) as solvent B. HPLC-grade  
485 acetonitrile and methanol were supplied from Fisher Scientific and were used without  
486 further purification. The optimum separation of amino acids was obtained using the  
487 following gradient program: 0% B for 1.9 min, then increase to 57% B up to 28.10 min  
488 followed by increase to 100% B up to 38.60 min, then hold at 100% B till 47.30 min,  
489 and decrease to 22.3% B up to 48.20 min and down to 0%B till 60 min. The flow rate  
490 was 1 mL/min. Aliquots of 10 µL standards/samples were injected at 0.5 min and amino  
491 acids were detected at the maximum wavelength of 338 nm with a 4 nm bandwidth.  
492 Retention times as well as spectral information given by the PDA detector were used  
493 for peak identification. Calibration curves of individual and mixed amino acids were  
494 prepared using either 250 pmol stocks of corresponding individual amino acids or a 250



495 pmol amino acid standard mix (Agilent #5061-3331). Quantification was performed  
496 using calibration curves of the respective amino acid standards.

497 **Biom mineral-free *Ac. echinator* ant generation.** Biom mineral-free *Ac. echinator* ants  
498 were generated using a sub-colony setup. Sub-colonies were set up in small (diameter  
499 6 cm, height 4 cm) clear plastic containers. After sterilizing containers for at least 20  
500 minutes using UV light, cotton moistened with distilled water was placed at the bottom  
501 to help provide humidity. A small (width 4.12 cm, length 4.12 cm and height 0.79 cm)  
502 weigh boat (Fisher catalogue #08-732-112) was placed on top of the wet cotton, and  
503 then 0.1 g of fungus garden, 2 minor workers, and a major worker pupa being reared to  
504 derive a biom mineral-free adult (n=10 sub-colonies). A ~1 cm<sup>2</sup> leaf fragment of pin oak  
505 (*Quercus palustris*) was added 24 hours or more after pupa eclosion for the ants to cut  
506 and incorporate into the fungus garden. We monitored sub-colonies daily to record  
507 eclosion date for the major worker pupa until 14–21 days after eclosion. Then we  
508 performed environmental Scanning Electron Microscopy (eSEM) and XRD on a subset  
509 of the ants to confirm mineral absence. Meanwhile, we established that *Ac. echinator*  
510 ants could grow mineral normally in this sub-colony with the addition of 2 major  
511 workers (n=10 sub-colonies) and other colony components were maintained as above.

512 **Nanomechanical testing.** Nanoindentation tests were carried out using a Bruker  
513 Hysitron PI-85 SEM Picoindenter in a Zeiss Leo 1550VP SEM at the Wisconsin  
514 Centers for Nanoscale Technology, UW-Madison. The samples were tested using a  
515 cube-corner probe with a basic quasistatic trapezoid load-controlled function, where  
516 the maximum load was 500  $\mu$ N, the hold time was 2 sec, and the loading/unloading  
517 rate was 100  $\mu$ N/sec<sup>52</sup>. SEM imaging was done in high vacuum using accelerating  
518 voltage of 3 kV with secondary electron mode. In order to simulate the defense  
519 mechanism of the actual ant exoskeleton, we tested the combination of ant mineral  
520 and ant cuticle by indenting from the outside in, as illustrated in Supplementary Fig.  
521 13. The samples for testing the combination of ant mineral and ant cuticle were  
522 prepared by slicing through the transverse plane of the head of the ant to allow  
523 probing only on the flatter top part of the head. All samples were then attached firmly  
524 to carbon tape on an SEM stub. The “combination” sample was additionally pressed  
525 carefully with tweezers to ensure good attachment and flatness. The indentation data  
526 and corresponding SEM video were analyzed to ensure: 1) that the correct contact  
527 point of the probe with the surface was chosen, 2) there was no movement of the  
528 sample during indentation, and 3) the load-displacement curve was smooth and there  
529 was no abrupt pop-out or discontinuity. Based on these criteria, 13, 13, 10, and 12  
530 valid data points were selected for *Ac. echinator* ant mineral plus cuticle and *Ac.*  
531 *echinator* ant cuticle cross-section, respectively. Measurements on other insect  
532 cuticles were also done by indenting from the outside in following the same analyzing  
533 criteria, with which 15, 13, 15, and 12 valid data points were selected for *Atta* soldier  
534 ant cuticle, *Atta* worker ant cuticle, beetle elytra, and honeybee cuticle, respectively.  
535 All the valid points were then used to obtain the hardness values<sup>53</sup> presented in Fig.  
536 3a. Additional hardness comparison of the mineral phases alone were done on

537 polished cross-sections of geologic dolomite and *Ac. echinator* mineral. Cross-  
538 section samples for were prepared using the same embedding and polishing  
539 procedures as described for the PEEM samples. Representative load-depth curves in  
540 Supplementary Fig. 14 were selected from the data point closest to the averaged  
541 hardness value in each sample.

542 **Aggressive experiments between *At. cephalotes* soldier and *Ac. echinator***  
543 **workers.** We confronted one major *At. cephalotes* soldier and three mineral-  
544 present/mineral-free workers of *Ac. echinator*<sup>54</sup>. The experiment was replicated 5  
545 times under reduced light in 9cm Petri dishes. Survival of ants were counted after 3  
546 hours of confrontation.

547 Using time lapse setting of an iPad Pro 2018, we recorded aggressive encounters  
548 between *At. cephalotes* soldier and *Ac. echinator* workers (Video S2 and S3). For the  
549 aggressive experiments with mineral-present ants, the video was started when *At.*  
550 *cephalotes* soldier was placed in the petri dish with the *Ac. echinator* ants. Video was  
551 stopped when the soldier ant was killed and the *Ac. echinator* worker was able to  
552 separate from the soldier ant. The video is a total of 42 minutes filmed in time lapse at  
553 120 times its speed reducing the video to 21 seconds in length, followed by editing it  
554 down to 10% of its speed using Premiere Pro resulting in a 3:27 minutes video. For  
555 the aggressive experiments with mineral-free ants, video was started when the soldier  
556 ant was placed into the petri dish, video was stopped after all 3 *Ac. echinator* ants  
557 were killed by the soldier ant. The video was recorded for 1 hour in time lapse at 120  
558 times its speed reducing the video to 30 seconds in length, followed by editing down  
559 to 10% of its original speed resulting in a video that is 5:00 minutes.

560 **Entomopathogenic fungi infection.** Using *Ac. echinator* major worker ants present  
561 and absent mineral, we conducted infection experiments using the entomopathogenic  
562 fungus *Metarhizium anisopliae* (Ascomycota, Hypocreales)<sup>55</sup>. In brief, every three  
563 ants were placed into an individual Petri dish with a ring of moist cotton. Then, each  
564 ant's propleural plate was inoculated with 0.5  $\mu$ l *Metarhizium* spores of ca.  $1.00 \times 10^7$   
565 conidiospores ml<sup>-1</sup> suspension + 0.01% Tween 20 by using a micropipette under  
566 dissecting microscope. The experiment was replicated 5 times and inoculated with  
567 control solution of sterile, deionized water + 0.01% Tween 20<sup>56</sup>. The survival of ants  
568 was monitored every 24 h post-treatment for 6 days.

569 **Reference**

- 570 1. Knoll, A. H. Biomineralization and evolutionary history. *Rev. Mineral.*  
571 *Geochem.* **54**, 329–356 (2003).
- 572 2. Eder, M., Amini, S. & Fratzl, P. Biological composites-complex structures for  
573 functional diversity. *Science* **362**, 543–547 (2018).
- 574 3. Sperling, E. A. *et al.* Oxygen, ecology, and the Cambrian radiation of animals.  
575 *Proc. Natl. Acad. Sci. U.S.A.* **110**, 13446–13451 (2013).
- 576 4. Gilbert, P. U. P. A. *et al.* Biomineralization by particle attachment in early  
577 animals. *Proc. Natl. Acad. Sci. U.S.A.* **116**, 17659–17665 (2019).
- 578 5. Gilbert, P. U. P. A., Abrecht, M. & Frazer, B. H. The organic-mineral  
579 interface in biominerals. *Mol. Geomicrobiol.* **59**, 157–185 (2018).
- 580 6. Wood, R., Ivantsov, A. Y. & Zhuravlev, A. Y. First macrobiota  
581 biomineralization was environmentally triggered. *Proc. R. Soc. B* **284**,  
582 20170059 (2017).
- 583 7. Sanderson, K. Artificial armour. *Nature* **519**, S14–S15 (2015).
- 584 8. Mass, T. *et al.* Amorphous calcium carbonate particles form coral skeletons.  
585 *Proc. Natl. Acad. Sci. U.S.A.* **114**, E7670–E7678 (2017).
- 586 9. DeVol, R. T. *et al.* Nanoscale transforming mineral phases in fresh nacre. *J.*  
587 *Am. Chem. Soc.* **137**, 13325–13333 (2015).
- 588 10. Weaver, J. C. *et al.* The stomatopod dactyl club: A formidable damage-  
589 tolerant biological hammer. *Science* **336**, 1275–1280 (2012).
- 590 11. Politi, Y., Arad, T., Klein, E. & Addadi, L. Sea urchin spine calcite forms via  
591 a transient amorphous calcium carbonate phase. *Science* **306**, 1161–1165  
592 (2004).
- 593 12. Li, L. *et al.* Multifunctionality of chiton biomineralized armor with an  
594 integrated visual system. *Science* **350**, 952–956 (2015).
- 595 13. Aizenberg, J., Tkachenko, A., Weiner, S., Addadi, L. & Hendler, G. Calcitic  
596 microlenses as part of the photoreceptor system in brittlestars. *Nature* **412**, 819  
597 (2001).
- 598 14. Killian, C. E. *et al.* Self-sharpening mechanism of the sea urchin tooth. *Adv.*  
599 *Funct. Mater.* **21**, 682–690 (2011).
- 600 15. Ma, Y. *et al.* The grinding tip of the sea urchin tooth exhibits exquisite control  
601 over calcite crystal orientation and Mg distribution. *Proc. Natl. Acad. Sci.*  
602 *U.S.A.* **106**, 6048–6053 (2009).

- 603 16. Wang, R. Z., Addadi, L. & Weiner, S. Design strategies of sea urchin teeth :  
604 Structure, composition and micromechanical relations to function. *Philos.*  
605 *Trans. R. Soc. B Biol. Sci.* **352**, 469–480 (1997).
- 606 17. Oakley, T. H., Wolfe, J. M., Lindgren, A. R. & Zaharoff, A. K.  
607 Phylotranscriptomics to bring the understudied into the fold: Monophyletic  
608 Ostracoda, fossil placement, and pancrustacean phylogeny. *Mol. Biol. Evol.*  
609 **30**, 215–233 (2013).
- 610 18. Schultz, T. R. & Brady, S. G. Major evolutionary transitions in ant agriculture.  
611 *Proc. Natl. Acad. Sci. U.S.A.* **105**, 5435–5440 (2008).
- 612 19. Li, H. *et al.* Convergent evolution of complex structures for ant-bacterial  
613 defensive symbiosis in fungus-farming ants. *Proc. Natl. Acad. Sci. U.S.A.* **115**,  
614 10720–10725 (2018).
- 615 20. Pinto-Tomás, A. A. *et al.* Symbiotic nitrogen fixation in the fungus gardens of  
616 leaf-cutter ants. *Science* **326**, 1120–1123 (2009).
- 617 21. Currie, C. R., Poulsen, M., Mendenhall, J., Boomsma, J. J. & Billen, J.  
618 Coevolved crypts and exocrine glands support mutualistic bacteria in fungus-  
619 growing ants. *Science* **311**, 81–83 (2006).
- 620 22. Currie, C. R., Scott, J. A., Summerbell, R. C. & Malloch, D. Fungus-growing  
621 ants use antibiotic-producing bacteria to control garden parasites. *Nature* **398**,  
622 701–704. (1999).
- 623 23. Currie, C. R., Mueller, U. G. & Malloch, D. The agricultural pathology of ant  
624 fungus gardens. *Proc. Natl. Acad. Sci. U.S.A.* **96**, 7998–8002 (1999).
- 625 24. Fowler, H. G. Field response of *Acromyrmex crassispinus* (forel) to aggression  
626 by *Atta sexdens* (linn.) and predation by *Labidus praedator* (fr. smith)  
627 (hymenoptera: Formicidae). *Aggress. Behav.* **3**, 385–391 (1977).
- 628 25. Vilela, E. F. & Howse, P. E. *Fire ants and leaf-cutting ants. Biology and*  
629 *management*. C. S. Lofgren, R. K. Vander Meer, Eds (Westview Press.  
630 Boulder, CO,1986), pp. 159-171.
- 631 26. Weber, N. A. *Gardening Ants: The Attines* (American Philosophical Society,  
632 Philadelphia, 1972).
- 633 27. Gilbert, P. U. P. A., Young, A. & Coppersmith, S. N. Measurement of *c*-axis  
634 angular orientation in calcite (CaCO<sub>3</sub>) nanocrystals using X-ray absorption  
635 spectroscopy. *Proc. Natl. Acad. Sci. U.S.A.* **108**, 11350–11355 (2011).
- 636 28. Beniash, E. *et al.* The hidden structure of human enamel. *Nat. Commun.* **10**,  
637 1–13 (2019).
- 638 29. Polishchuk, I. *et al.* Coherently aligned nanoparticles within a biogenic single  
639 crystal: A biological prestressing strategy. *Science* **358**, 1294–1298 (2017).

- 640 30. Cody, G. D. *et al.* Molecular signature of chitin-protein complex in Paleozoic  
641 arthropods. *Geology* **39**, 255–258 (2011).
- 642 31. Kaznatcheyev, K. *et al.* Innershell absorption spectroscopy of amino acids. *J.*  
643 *Phys. Chem. A* **106**, 3153–3168 (2002).
- 644 32. Zhang, F., Xu, H., Konishi, H., Shelobolina, E. S. & Roden, E. E.  
645 Polysaccharide-catalyzed nucleation and growth of disordered dolomite: A  
646 potential precursor of sedimentary dolomite. *Am. Mineral.* **97**, 556–567 (2012)
- 647 33. Lippmann, F. *Sedimentary carbonate minerals* (Springer, New York, 1973).
- 648 34. Yang, L., Killian, C. E., Kunz, M., Tamura, N. & Gilbert, P. U. P. A.  
649 Biomineral nanoparticles are space-filling. *Nanoscale* **3**, 603–609 (2011).
- 650 35. Hölldobler, B. & Wilson, E. O. *The superorganism: the beauty, elegance, and*  
651 *strangeness of insect societies* (WW Norton, New York, 2008).
- 652 36. Dijkstra, M. B. & Boomsma, J. J. *Gnamptogenys hartmani* Wheeler  
653 (Ponerinae: Ectatommini): An agro-predator of *Trachymyrmex* and  
654 *Sericomyrmex* fungus-growing ants. *Naturwissenschaften.* **90**, 568–571  
655 (2003).
- 656 37. Nygaard, S. *et al.* Reciprocal genomic evolution in the ant-fungus agricultural  
657 symbiosis. *Nat. Commun.* **7**, 1–9 (2016).
- 658 38. Diamond, J. M. & Ordunio, D. *Guns, germs, and steel* (Books on Tape, 1999).
- 659 39. Graf, D. L. & Goldsmith, J. R. Some hydrothermal syntheses of dolomite and  
660 protodolomite. *J. Geol.* **64**, 173–186 (1956).
- 661 40. Sun, C. Y. *et al.* Spherulitic growth of coral skeletons and synthetic aragonite:  
662 nature's three-dimensional printing. *ACS Nano* **11**, 6612–6622 (2017).
- 663 41. Gong, Y. U. *et al.* Phase transitions in biogenic amorphous calcium carbonate.  
664 *Proc. Natl. Acad. Sci. U.S.A.* **109**, 6088–6093 (2012).
- 665 42. De Stasio, G., Frazer, B. H., Gilbert, B., Richter, K. L. & Valley, J. W.  
666 Compensation of charging in X-PEEM: a successful test on mineral inclusions  
667 in 4.4Ga old zircon. *Ultramicroscopy* **98**, 57–62 (2003).
- 668 43. Myers, C. E. *et al.* Exceptional preservation of organic matrix and shell  
669 microstructure in a Late Cretaceous *Pinna* fossil revealed by photoemission  
670 electron spectromicroscopy. *Geology* **46**, 711–714 (2018).
- 671 44. DeVol, R. T. *et al.* Oxygen spectroscopy and polarization-dependent imaging  
672 contrast (PIC)-mapping of calcium carbonate minerals and biominerals. *J.*  
673 *Phys. Chem. B* **118**, 8449–8457 (2014).
- 674 45. Zou, Z. *et al.* A hydrated crystalline calcium carbonate phase: Calcium  
675 carbonate hemihydrate. *Science* **363**, 396–400 (2019).
- 676 46. Macros, G. G. <http://home.physics.wisc.edu/gilbert/software.htm>. (2019).

- 677 47. DeVol, R. T. *et al.* Oxygen spectroscopy and polarization-dependent imaging  
678 contrast (PIC)-mapping of calcium carbonate minerals and biominerals. *J.*  
679 *Phys. Chem. B* **118**, 8449–8457 (2014).
- 680 48. Pokroy, B. *et al.* Narrowly distributed crystal orientation in biomineral  
681 vaterite. *Chem. Mater.* **27**, 6516–6523 (2015).
- 682 49. Stohr, J. *NEXAFS Spectroscopy* (Springer-Verlag, Berlin, 1992).
- 683 50. Madix, R. J., Solomon, J. L. & Stohr, J. The orientation of the carbonate anion  
684 on Ag(110). *Surf. Sci.* **197**, L253–L259 (1988).
- 685 51. Henderson Jr, J. W., Ricker, R. D., Bidlingmeyer, B. A. & Woodward, C.  
686 Rapid, accurate, sensitive and reproducible HPLC analysis of amino acids.  
687 Agilent Pub.# 5980-1193E (2000)
- 688 52. S. Amini, M. Tadayon, S. Idapalapati, A. Miserez, The role of quasi-plasticity  
689 in the extreme contact damage tolerance of the stomatopod dactyl club. *Nat.*  
690 *Mater.* **14**, 943–950 (2015).
- 691 53. Oliver, W. C. & Pharr, G. M. An improved technique for determining  
692 hardness and elastic modulus using load and displacement sensing indentation  
693 experiments. *J. Mater. Res.* **7**, 1564–1583 (1992).
- 694 54. Hölldobler, B. & Wilson, E. O. *The Ants* (Harvard Univ. Press, Cambridge,  
695 MA, 1990).
- 696 55. Wang, C. & Wang, S. Insect pathogenic fungi: genomics, molecular  
697 interactions, and genetic improvements. *Annu. Rev. Entomol.* **62**, 73–90  
698 (2017).
- 699 56. Wang, B., Kang, Q., Lu, Y., Bai, L., Wang, C. Unveiling the biosynthetic  
700 puzzle of destruxins in *Metarhizium* species. *Proc. Natl. Acad. Sci. U.S.A.*  
701 **109**, 1287–1292 (2012).

702 **Acknowledgement**

703 We thank U. P. Agarwal and S. A. Ralph from US Forest Products Laboratory for the  
704 Raman spectroscopy measurements; B. Schneider and R. Noll for expert help  
705 conducting SEM work; J. Morasch for assistance with nanoindentation  
706 measurements; E. Okonski for ant imaging and laboratory assistance; and R. J.  
707 Massey for assistance with microtome.

708 **Funding:** This work was primarily supported by the National Institutes of Health  
709 (NIH) Grant U19 TW009872-05, NIH Grant U19 AI109673 and the Department of  
710 Energy Great Lakes Bioenergy Research Center Office of Science Grant DE-FC02-  
711 07ER64494 to C.R.C. P.U.P.A.G. acknowledges support from the U.S. Department of  
712 Energy, Office of Science, Office of Basic Energy Sciences, Chemical Sciences,  
713 Geosciences, and Biosciences Division, under Award DE-FG02-07ER15899, and  
714 NSF grant DMR-1603192. PEEM experiments were done at the Advanced Light  
715 Source, which is a DOE Office of Science User Facility supported by grant DE-  
716 AC02-05CH11231. T.R.S. is supported by the National Science Foundation award  
717 DEB 1654829. H.X. and Y.F. is supported by the NASA Astrobiology Institute  
718 (NNA13AA94A) and S. W. Bailey Scholarship of the Department of Geoscience.

719 **Author contributions:** Study design: H.L., C.-Y.S., P.U.P.A.G., C.R.C.  
720 Experimental design and supervision: H.L., C.-Y.S., T.R.S., P.U.P.A.G., C.R.C. Data  
721 collection and analysis: H.L., C.-Y.S., Y.F., C.M.C., H.X., A.J., J.S-C., R.Z., H.A.B.,  
722 J.H.F., D.R.A., T.R.S., P.U.P.A.G., C.R.C. Initial draft: H.L., C.R.C., T.R.S. C.-Y.S.,  
723 P.U.P.A.G. Final version: All authors.

724 **Competing interests:** The authors declare that they have no competing interests.

725 **Data and materials availability:** All data is available in the main text or the  
726 supplementary materials.

727 **Supplementary Information:**

728 Supplementary Text

729 Supplementary Tables 1-4

730 Supplementary Figures 1-26

731 Supplementary Videos 1-3

732 References (57-59)



733 **Fig. 1. Morphological, structural, and chemical characterization of minerals on**  
734 **the cuticle of the leaf-cutting ant *Acromyrmex echinator*.** **a**, *Ac. echinator* ant with  
735 whitish cuticular coating. **b**, *In situ* XRD analysis identifying the cuticular crystalline  
736 layer as high-Mg calcite. Inset: SEM image of ant cuticle with crystalline coating. **c**-  
737 **h**, XANES spectroscopy and mapping with PEEM of cuticular cross-section. **c**,  
738 Average of PEEM images acquired across the C K-edge, showing crystalline layer  
739 tightly attached to cuticle. Three distinct component spectra were identified in the  
740 regions labeled cuticle, epicuticle, and biomineral, from the most internal part of the  
741 ant (bottom right of micrograph) to the outer surface. **d**, Normalized component  
742 spectra extracted from the corresponding labeled regions. Characteristic peaks are  
743 marked, including the 285.2 eV (C=C), 288.2 eV (C=O) and 290.3 eV (carbonate)  
744 peaks. **e**, Component map where each pixel is colored according to the chemical  
745 components it contains. Black pixels are masked areas containing epoxy or gaps.  
746 Faint carbonate components within the cuticle and epicuticle were emphasized by  
747 enhancing the blue channel 5×, thus this is a semi-quantitative map. A fully  
748 quantitative RGB component map is presented in Supplementary Fig. 23. Individual  
749 maps of each component are presented in Supplementary Fig. 24, clearly showing an  
750 increasing gradient of carbonates towards the surface in the cuticle. **f**, O K-edge  
751 spectra extracted from the mineral crystals correspondingly colored in the  
752 Polarization-dependent Imaging Contrast (PIC) maps in **g** and **h**. **g**, Magnified PIC  
753 maps for the regions represented by boxes in the complete PIC map in **h**. **h**, PIC map  
754 quantitatively displaying the orientations of the mineral crystals' *c*-axes in colors.  
755 This map was acquired from the same area shown in **c** and **e** at precisely the same  
756 magnification. These are interspersed high- and low-Mg calcite, and heterogenous at  
757 the nanoscale. Biomineral crystals do not show preferred orientations, but are  
758 randomly oriented. High-magnesium calcite in carbon spectra is identified by the  
759 carbonate peak at 290.3 eV, which occurs in all carbonates, amorphous or crystalline.

760 The O spectra in d clearly indicate crystallinity, and their lineshape indicates a  
761 mixture of high-magnesium calcite or Mg-bearing calcite.

762 **Fig. 2. Mineral precipitation on the cuticle of the leaf-cutting ant *Acromyrmex***  
763 ***echinator* in both *in vitro* cuticle synthetic studies and ant-rearing experiments.**  
764 **a**, Scheme of *in vitro* mineralization experiment using *Acromyrmex echinator* leaf-  
765 cutting ant cuticles as templates for biomineralization. **b** and **c**, Pre- and post-  
766 incubation SEM images showing the original, uncoated cuticle (b) and the cuticle  
767 covered by a layer of precipitated carbonate (c) after incubation in  $Mg^{2+}/Ca^{2+}/Cl^-$   
768  $/Na^+/HCO_3^-$  solution for 7 days at 19 °C. **d**, XRD patterns of, from top to bottom, an  
769 uncoated ant cuticle, a cuticle after incubation in  $Mg^{2+}/Ca^{2+}/Cl^-/Na^+/HCO_3^-$  solution, a  
770 platinum-coated cuticle incubated in  $Mg^{2+}/Ca^{2+}/Cl^-/Na^+/HCO_3^-$  solution, and a cuticle  
771 after KOH protein hydrolysis incubated in  $Mg^{2+}/Ca^{2+}/Cl^-/Na^+/HCO_3^-$  solution. H:  
772 high-magnesium-calcite, A: aragonite, Pt: platinum. **e**, XRD patterns of cuticles of  
773 ants representing different developmental stages, ranging from (from bottom to top), a  
774 newly formed pupa to an older worker, after incubation in  $Mg^{2+}/Ca^{2+}/Cl^-/Na^+/HCO_3^-$   
775 solution. **f**, Environmental scanning electron micrographs (eSEM) of ant epicuticles  
776 taken over a 10-day time series, from immediately after eclosion from pupa to adult  
777 (left), to 10 days post-eclosion (right), showing the formation of the biomineral layer  
778 over time. **g**, Estimated magnesium concentration of the biomineral layer during 30  
779 days of ant development based on the XRD  $d_{(104)}$  value according to Graf and  
780 Goldsmith (1956)<sup>39</sup>, showing the rapid integration of magnesium from days 6 to 8 and  
781 the continued presence of high magnesium content for up to 30 days.

782 **Fig. 3. Mechanical protection afforded by the epicuticular mineral layer. a**,  
783 Quantitative nano-mechanical properties of insect cuticles, including honey bee (*Apis*  
784 *mellifera*), beetle (*Xylotrechus colonus*), leaf-cutting ants (*Atta cephalotes* worker,  
785 *Atta cephalotes* soldier, and *Acromyrmex echinator* worker without biomineral) and  
786 *Ac. echinator* ant worker with biomineral epicuticular layer, measured by an *in-situ*  
787 nanoindenter with a cube-corner probe. **b-d**, Aggressive interaction between three *Ac.*

788 *echinator* workers (with/without biomineral, respectively) and *Atta cephalotes*  
789 soldier. **b**, *Ac. echinator* worker (left) aggressively interacts with *Atta cephalotes*  
790 soldier (right). **c**, In aggressive encounters with *Atta cephalotes* soldiers, *Ac.*  
791 *echinator* workers with biomineral armor (orange) lose substantially fewer body  
792 parts (i.e., legs, antennae, abdomen, and head) compared to *Ac. echinator* worker  
793 without biomineral (green). **d**, Survivorship of *Ac. echinator* workers without (green)  
794 and with (orange) biomineral armor in aggressive encounters with *Atta cephalotes*  
795 soldiers (purple). Asterisks indicate significant differences via two-sample *t* test ( $*P <$   
796  $0.05$ ;  $**P < 0.001$ ). **e**, Survivorship curves of *Ac. echinator* worker with and without  
797 an epicuticular biomineral layer exposed to the entomopathogenic fungus  
798 *Metarhizium*. The inset images show more substantial fungal growth and emergence  
799 from biomineral-free workers.

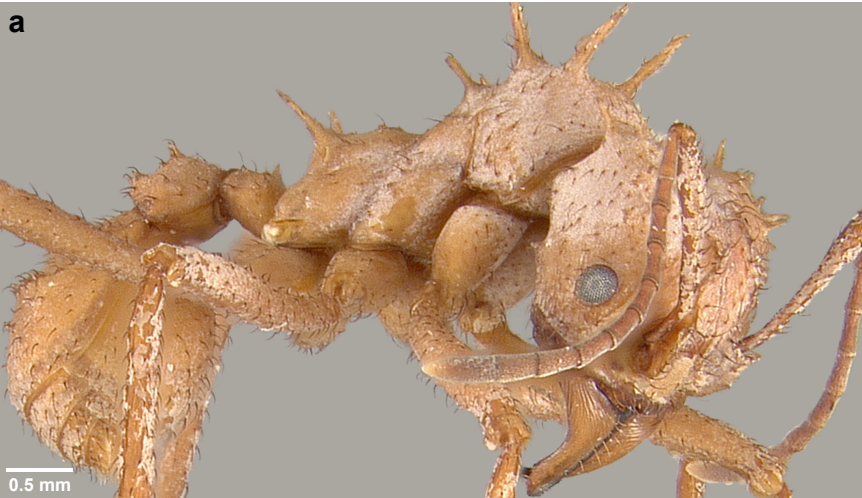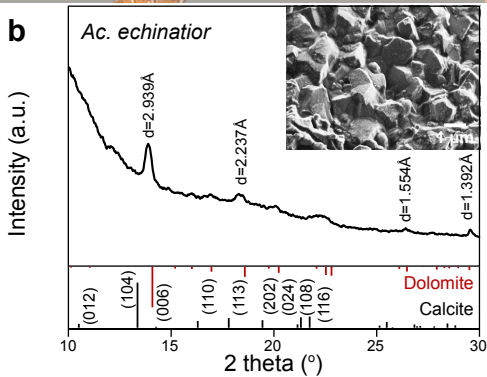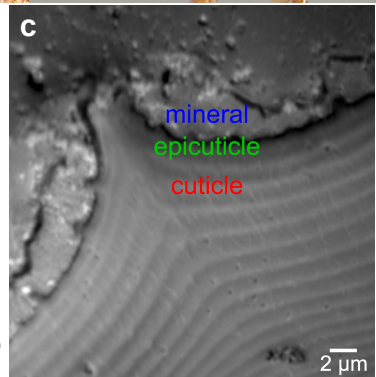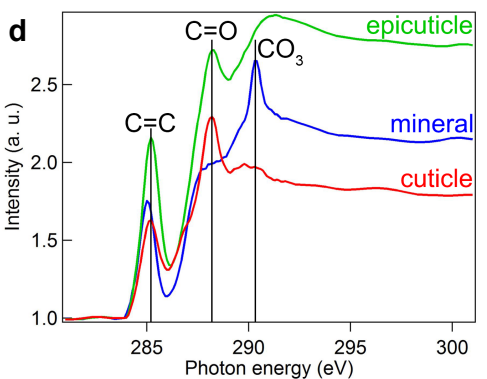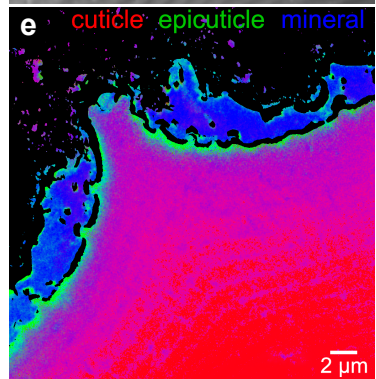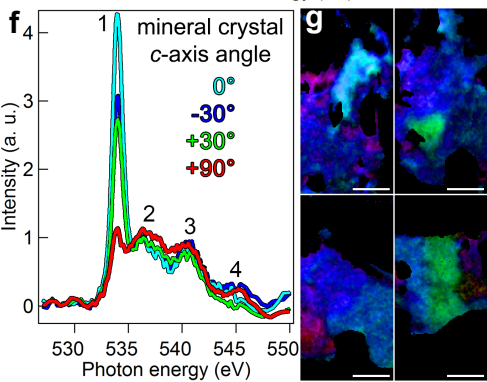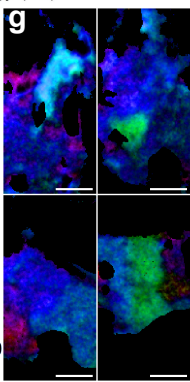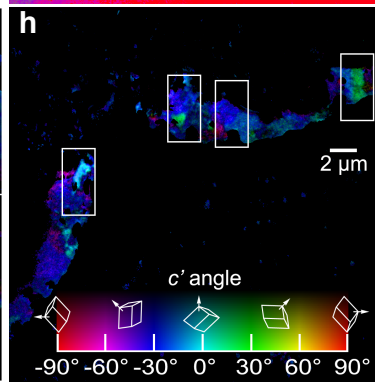

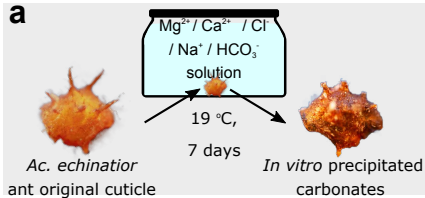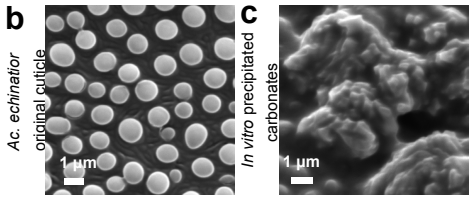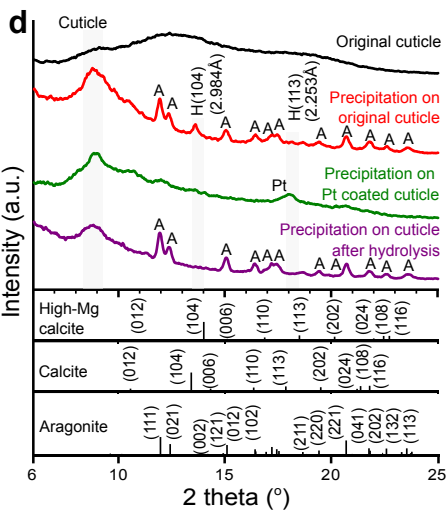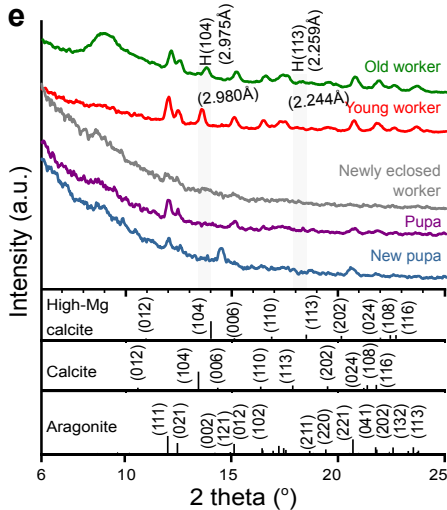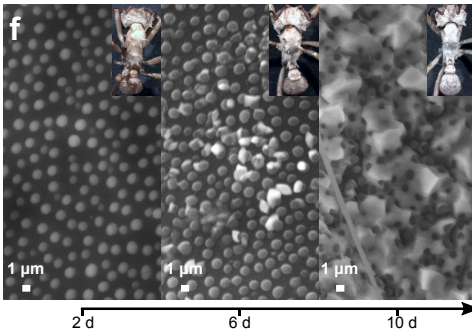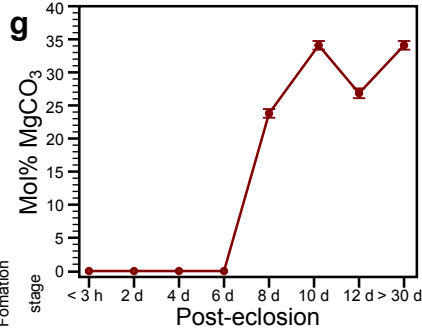

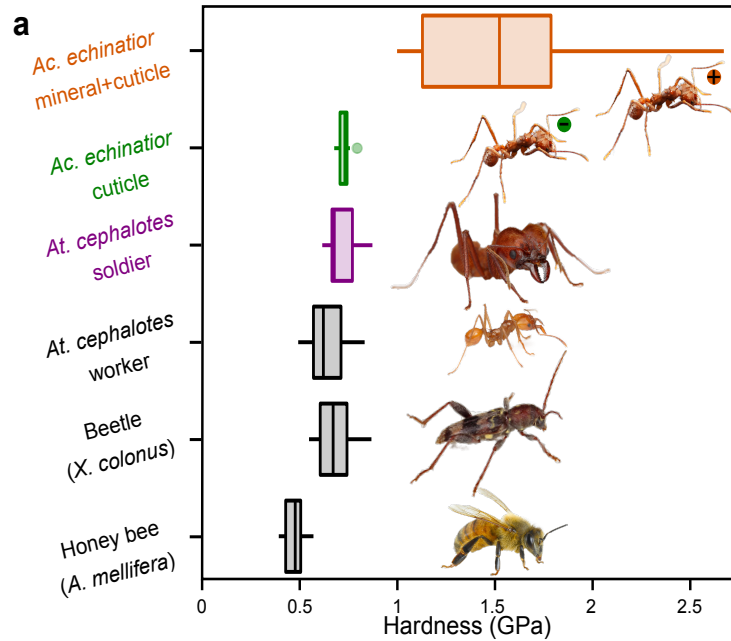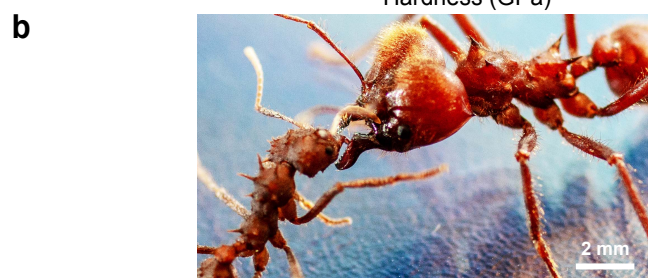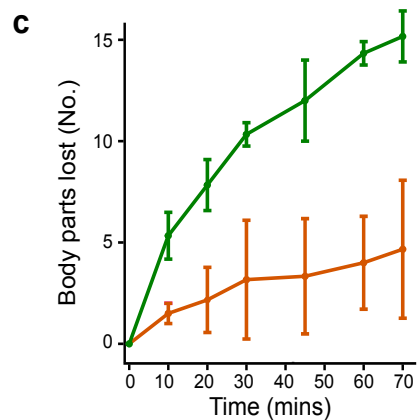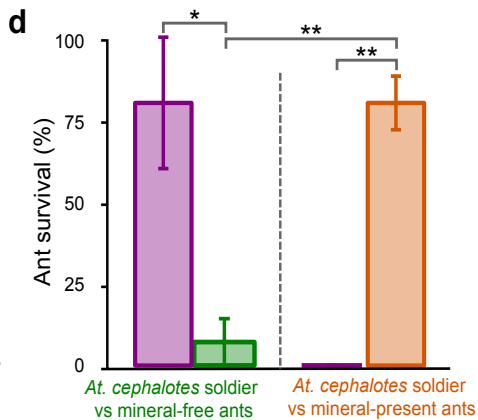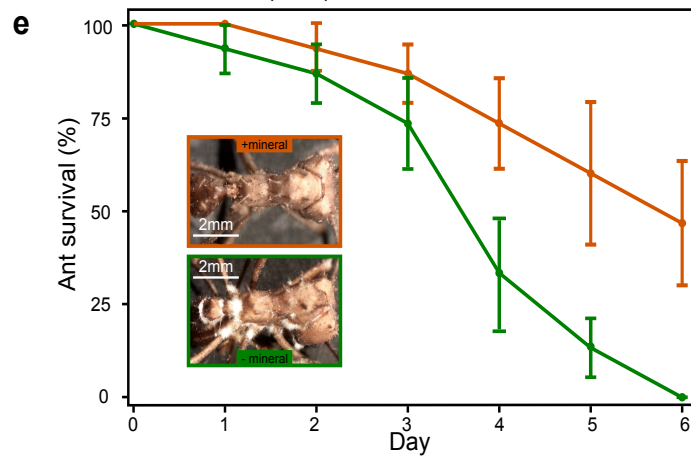

Source: https://www.biorxiv.org/content/10.1101/2020.05.18.102962v1.full.pdf
